# Supplementary material for: Evolutionary morphology of the lizard chemosensory system
Source: PubMed Central journal article supplement (PMC5583331; doi:10.1038/s41598-017-09415-7), 2017-09-04
Supplement: 41598_2017_9415_MOESM1_ESM.pdf [file 41598_2017_9415_MOESM1_ESM.pdf]

## Evolutionary morphology of the lizard chemosensory system

Simon Baeckens<sup>1,\*</sup>, Anthony Herrel<sup>2</sup>, Chris Broeckhoven<sup>3</sup>, Menelia Vasilopoulou-Kampitsi<sup>1</sup>, Katleen Huyghe<sup>1</sup>, Jana Goyens<sup>1</sup> and Raoul Van Damme<sup>1</sup>

<sup>1</sup> Laboratory of Functional Morphology, Department of Biology, University of Antwerp, Universiteitsplein 1, 2610 Wilrijk, Belgium

<sup>2</sup> UMR7179, CNRS/MNHN, 75005 Paris, France

<sup>3</sup> Department of Botany & Zoology, Stellenbosch University, Private Bag X1, Matieland 7602, Stellenbosch, South Africa

\* Corresponding author.

E-mail address: [simon.baeckens@uantwerp.be](mailto:simon.baeckens@uantwerp.be)

### Short running title:

Evolution of the lizard chemosensory system

---

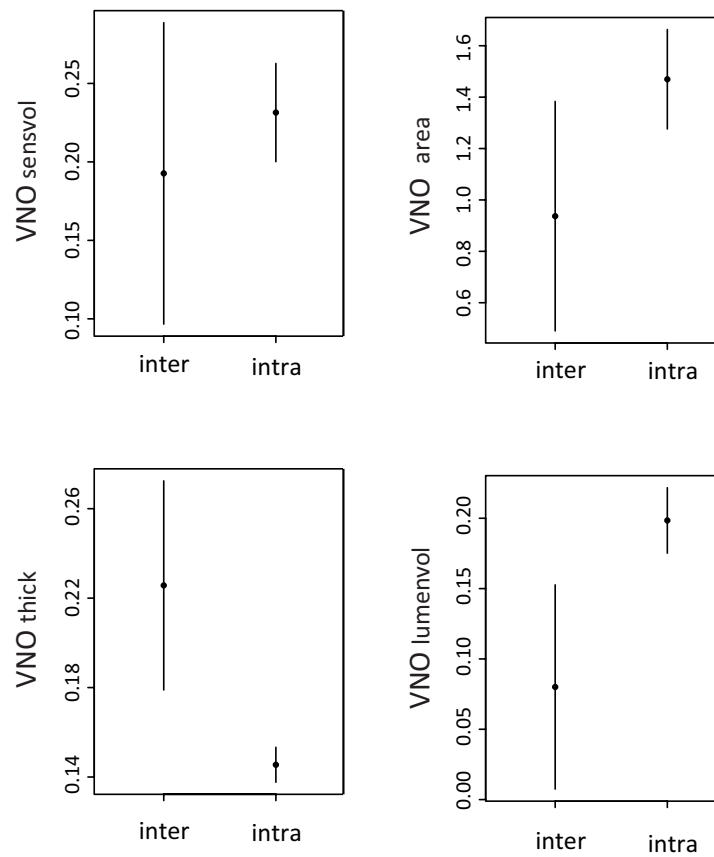

**Figure Supplementary Material** — Graphs showing the interspecific and intraspecific mean values for the different vomeronasal organ (VNO) measurements used in this study. Means are calculated and presented for 16 species (interspecific; ‘inter’) and for 7 individuals of one species, *Podarcis peloponnesiacus* (intraspecific; ‘intra’). Error bars are standard deviations (SDs) and show that among-species variation is much larger than within-species variation.
